# Supplementary material for: Injectable dual cross-linked adhesive hyaluronic acid multifunctional hydrogel scaffolds for potential applications in cartilage repair
Source: Royal Society of Chemistry journal article supplement (doi:10.1039/d0py00371a), 2020-01-01
Supplement: d0py00371a1.pdf [file d0py00371a1.pdf]

# Injectable dual cross-linked adhesive hyaluronic acid multifunctional hydrogel scaffolds for promoting cartilage repair

(Supporting Information)

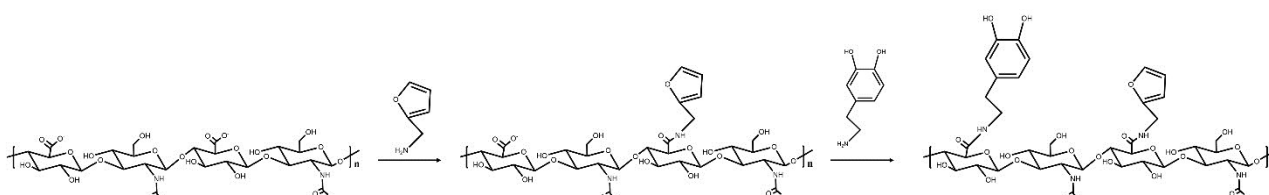

**Scheme S1** The modification of HA-Furan-DA

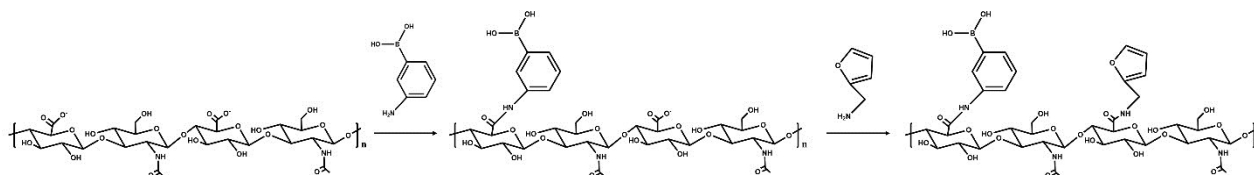

**Scheme S2** The modification of HA-Furan-PBA

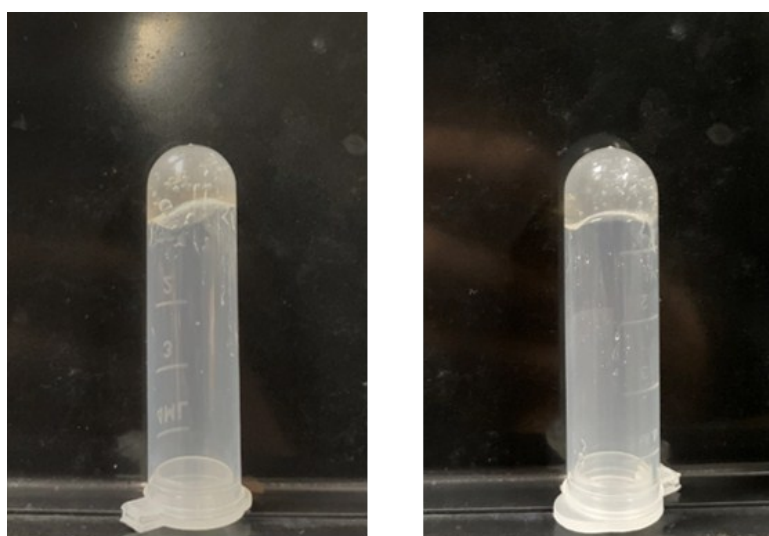

**Fig. S1** Gelation occurred without glucose (left) and with 4 g/mL glucose (right).

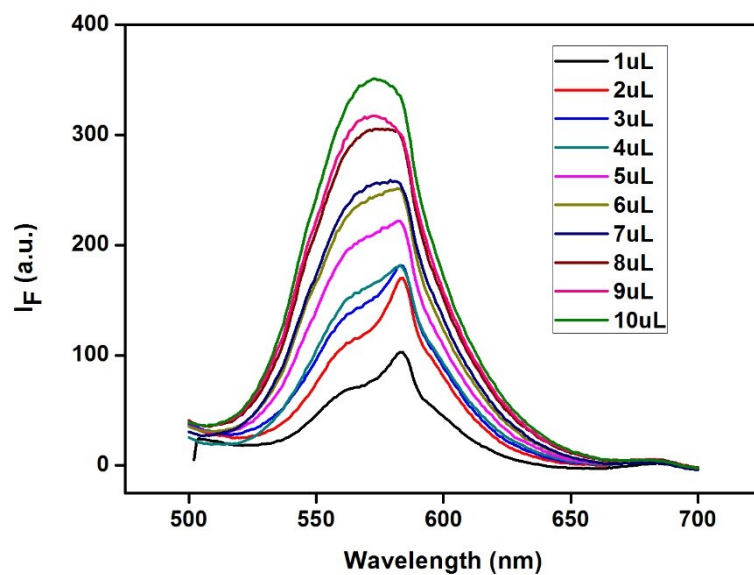

**Fig.S2** The Fluorescent emission spectra during addition of ARS to the HA-Furan-PBA solution.

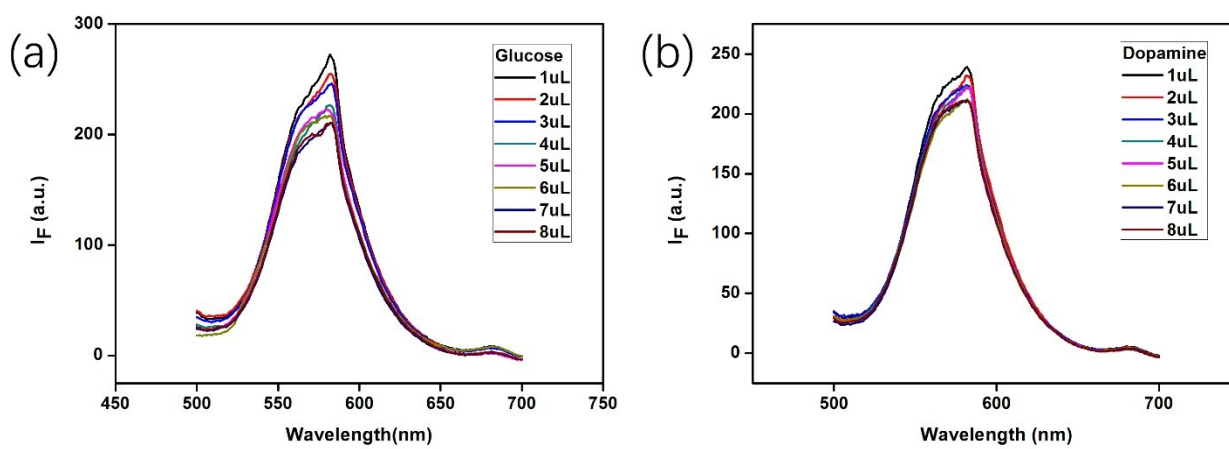

**Fig.S3** The Fluorescent emission spectra during addition of (a) glucose and (b) dopamine to the HA-Furan-PBA/ARS conjugate.

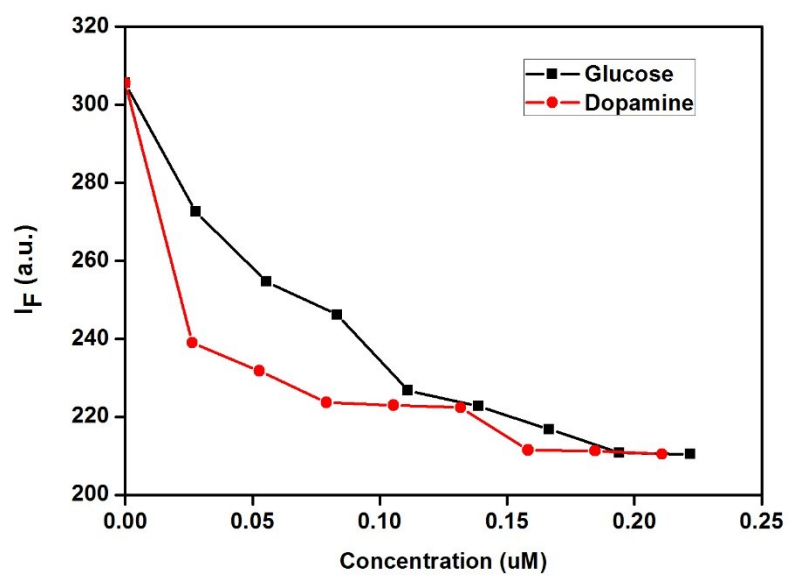

**Fig.S4** The maximum emission intensity vs the glucose and dopamine concentration.
